# Supplementary material
Source: PubMed Central journal article supplement (PMC1275583)
Supplement: nar_33_19_6164__2.pdf [file nar_33_19_6164__2.pdf]

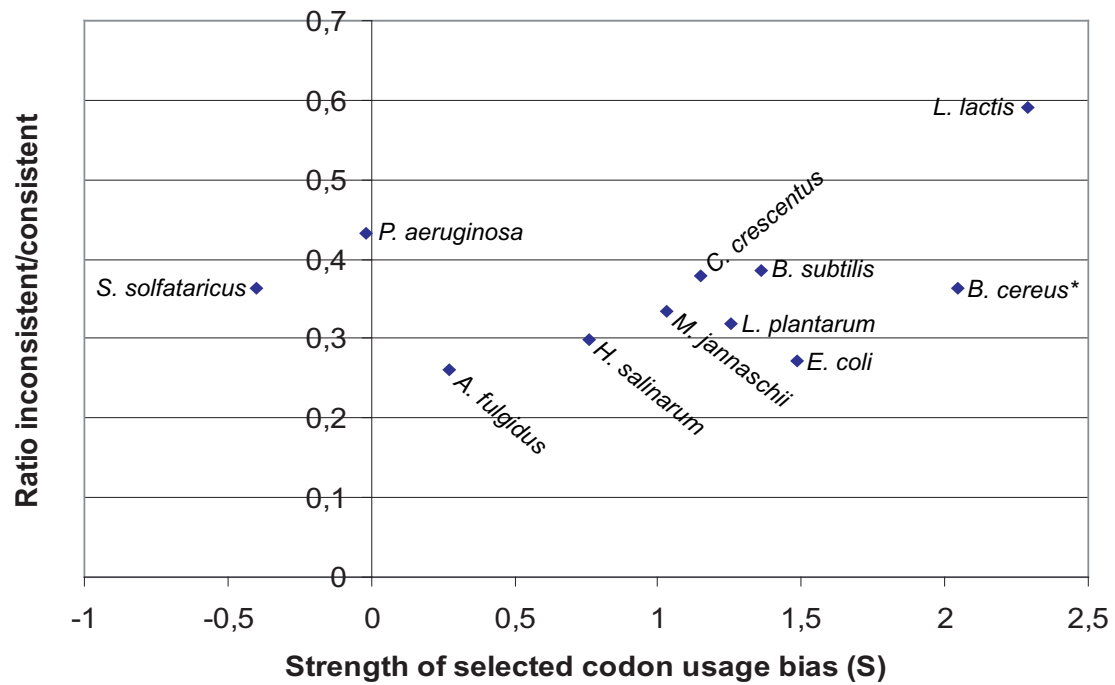

\*S-value of *B. anthracis*. *B. cereus* and *B. anthracis* genomes are not sufficiently enough diverged. Therefore, only the *B. anthracis* S-value is calculated by Sharp and coworkers (Nucleic Acid Research, 2005, Vol. 33, No. 4).
